# Supplementary material for: Boosting water oxidation electrocatalysts with surface engineered amorphous cobalt hydroxide nanoflakes
Source: Royal Society of Chemistry journal article supplement (doi:10.1039/c8nr04195d), 2018-01-01
Supplement: c8nr04195d2.pdf [file c8nr04195d2.pdf]

## Supporting Information

### Boosting Water Oxidation Electrocatalysts with Surface Engineered

### Amorphous Cobalt Hydroxide Nanoflakes

Haoxuan Zhang,<sup>a</sup> Bingxu Chen,<sup>b</sup> Hao Jiang,<sup>\*a</sup> Xuezhi Duan,<sup>b</sup> Yihua Zhu,<sup>a</sup> Chunzhong Li<sup>\*a</sup>

<sup>a</sup>. Key Laboratory for Ultrafine Materials of Ministry of Education, School of Materials Science and Engineering, East China University of Science and Technology, Shanghai 200237, China

<sup>b</sup>. State Key Laboratory of Chemical Engineering and Department of Chemical Engineering, East China University of Science and Technology, Shanghai 200237, China

\*Corresponding author: Tel.: +86-21-64250949, Fax: +86-21-64250624

E-mail: [jianghao@ecust.edu.cn](mailto:jianghao@ecust.edu.cn) (Prof. H. Jiang) [czli@ecust.edu.cn](mailto:czli@ecust.edu.cn) (Prof. C. Z. Li)

## Part I: Experimental Section

### 1.1 Synthesis of $\text{Co(OH)}_x\text{S}$ nanoflakes:

Commercial Ni foam ( $0.6\text{ cm} \times 0.5\text{ cm} \times 0.3\text{ mm}$ ) was immersed in 3 M HCl for 15 minutes to remove surface oxides before use. And a two-electrode system was built with a cleaned nickel foam as working electrode, a graphite bar as both counter and reference electrode, and 30 mL aqueous solution containing  $\text{Co(NO}_3)_2 \cdot 6\text{H}_2\text{O}$  (1.5 mmol) and  $\text{C}_2\text{H}_5\text{NS}$  (4.5 mmol) as electrolyte. The electrodeposition process was performed on Ni foam by repeated current-polarity switching strategy. Typically, a current of -5 mA was firstly applied using a galvanostatic method for 200 s, and then switched to 3 mA for 250 s. After this process was repeated four times, the  $\text{Co}_1(\text{OH})_x\text{S}_1$  nanoflakes have been obtained. The S/Co ratio can be conveniently regulated by changing the anodic deposition time, *e.g.*  $\text{Co(OH)}_x\text{S}_{0.6}$  (150 s) and  $\text{Co(OH)}_x\text{S}_2$  (350 s). In addition, pure  $\text{Co(OH)}_x$  nanoflakes were also synthesized for comparison using a current of -5 mA for 800 s in 0.0015 M  $\text{Co(NO}_3)_2 \cdot 6\text{H}_2\text{O}$  solution (30 mL).

### 1.2 Characterization:

The structure and morphology of the as-obtained samples were characterized by X-ray powder diffraction (XRD; Rigaku D/Max 2550, Cu  $\text{K}\alpha$  radiation) at a scan rate of  $1^\circ\text{ min}^{-1}$ , field-emission scanning electron microscopy (FESEM, Hitachi, S-4800, 15 kV), transmission electron microscopy (TEM; JEOL, JEM-2100F) with an X-ray energy dispersive spectrometer (EDS) and an electron energy loss spectroscopy (EELS) at an accelerating voltage of 200 kV, and X-ray photoelectron spectroscopy (XPS; Thermal Scientific, EscaLab 250Xi). Inductively coupled plasma mass spectrometry (ICP-MS) was performed by an Agilent 7700 spectrometer.

### 1.3 Electrochemical Measurements:

The electrochemical measurements were performed in a standard three-electrode system connected to an electrochemical workstation (CHI 660E) with a saturated Ag/AgCl reference electrode and a graphite counter electrode. The electrocatalysts supported on Ni foam were directly used as a working electrode. The loading mass of electrocatalysts on Ni foam is about 1.0 mg cm<sup>-2</sup>. All potentials measured were calibrated to reversible hydrogen electrode (RHE) by the following equation:

$$E_{RHE} = E_{Ag/AgCl} + 0.1976 + 0.0591 \times pH$$

All measurements were performed in 1.0 M KOH aqueous solution under gently stirring to get rid of bubbles. Before the electrochemical measurements, the electrolyte was purged with O<sub>2</sub> for at least 30 minutes to achieve an O<sub>2</sub>-saturated condition. The electrocatalysts were activated in advance at a current density of 10 mA cm<sup>-2</sup> until the voltage keeps unchanged. Linear sweep voltammetry at sweep rate of 1 mV s<sup>-1</sup> and chronopotentiometry were performed with 95 % *iR* drop compensation. Electrochemical impedance spectroscopy (EIS) was performed by a three-electrode cell system in frequency range from 10 kHz to 100 mHz. The turnover frequency (TOF) was calculated by the following equation:

$$TOF = \frac{J \times A}{2 \times F \times n}$$

where *J* is the current density in the LSV curves, *A* is the geometric area of electrode, *F* is the Faraday constant (C mol<sup>-1</sup>), and *n* is the mole number of active sites on the electrode. The Co contents are 0.0014, 0.0017, 0.0019 and 0.0010 mmol in Co(OH)<sub>x</sub>S<sub>0.6</sub>, Co(OH)<sub>x</sub>S, Co(OH)<sub>x</sub>S<sub>2</sub> and Co(OH)<sub>x</sub> samples, respectively, based on the inductively coupled plasma mass spectrometry (ICP-MS) results. As comparisons, the Co(OH)<sub>x</sub> nanoflakes, the Co(OH)<sub>x</sub>S nanoflakes aggregation and the commercial RuO<sub>2</sub> powders supported on Ni foam (loading mass = 1.0 mg cm<sup>-2</sup>) were respectively measured for OER performance.

#### 1.4 DFT Calculations:

All periodic spin-polarized DFT calculations were performed using the Vienna ab initio simulation package (VASP).<sup>S1-S3</sup> The interactions between ion cores and valence electrons were described by the projector augmented wave (PAW) method, and the exchange-correlation energy of the electrons was obtained within the GGA-DFT plus Hubbard-U framework, which has been shown to improve the description of cobalt oxides, and the value of (U-J) equal to  $U_{\text{eff}} = 3.52$  eV was used throughout this work according to previous studies.<sup>S4-S8</sup> The solution of the Kohn-Sham equations was expanded in a plane wave basis set with a cutoff energy of 400 eV. The Brillouin zone sampling was performed using a Monkhorst-Pack grid, and electronic occupancies were determined in light of a Methfessel-Paxton scheme with an energy smearing of 0.2 eV.<sup>S9-S10</sup> In all the calculations, a force-based conjugated gradient method was used to optimize the geometries.<sup>S11</sup> Saddle points and minima were considered to be converged when the maximum force in each degree of freedom was less than  $0.03 \text{ eV } \text{\AA}^{-1}$ . Atomic charges were calculated based on the method due to Bader with the algorithms developed by Henkelman *et al.*, and the core charge density was included in the partitioning.<sup>S12,S13</sup>

In alkaline media, the oxygen evolution reaction (OER) can proceed through a four-electron reaction, which can be written as following elementary steps:

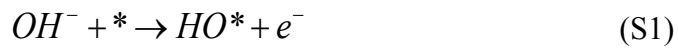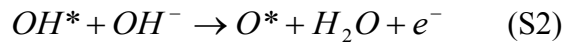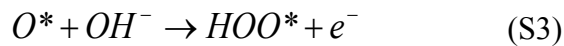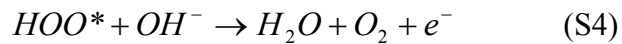

where \* stands for OER active sites, and  $HO^*$ ,  $O^*$ ,  $HOO^*$  are absorbed intermediates. The overpotentials of OER can be determined by computing the free energies of the different elementary steps, which is defined as the difference between free energies of the initial and final states for each steps, and can be given by the following equation:

$$\Delta G = \Delta E + \Delta ZPE - T\Delta S + \Delta G_U + \Delta G_{pH} \quad (S5)$$

where  $\Delta E$  is the reaction energy of reactants and products adsorbed on catalyst surface,  $\Delta ZPE$  is the change of zero-point energy,  $T$  is the temperature,  $\Delta S$  is the entropy change at 298.15K,  $\Delta G_U = -eU$  ( $U$  is the electrode potential and  $e$  is the transferred charge), and  $\Delta G_{pH}$  is the correction of the  $H^+$  free energy. The overpotential can be calculated by the following equations:

$$\Delta G_{OER} = \max \{\Delta G_1, \Delta G_2, \Delta G_3, \Delta G_4\} \quad (S6)$$

$$\eta^{OER} = \max \frac{\{\Delta G_1, \Delta G_2, \Delta G_3, \Delta G_4\}}{e} - 1.23 \quad (S7)$$

Structure of CoOOH is calculated and the corresponding lattice parameters (*i.e.*,  $a = 2.84 \text{ \AA}$ ,  $b = 13.00 \text{ \AA}$ ) are in accordance with previous experimental and theoretical results.<sup>S8</sup> We cleaved the (0001) surface of the CoOOH with the cell size of  $2 \times 2$  primitive cell and vacuum thickness of  $10 \text{ \AA}$ . To mimic sulfur engineered CoOOH layer, sulfur atoms were absorbed on the CoOOH (0001) surface as the computational model.

## Part II: Supporting Figures

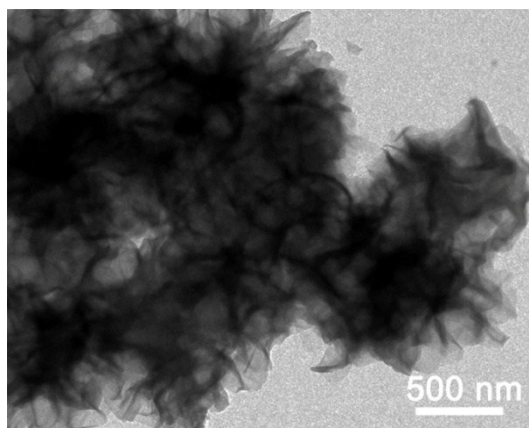

**Fig. S1** TEM image of  $\text{Co(OH)}_x\text{S}$  nanoflakes.

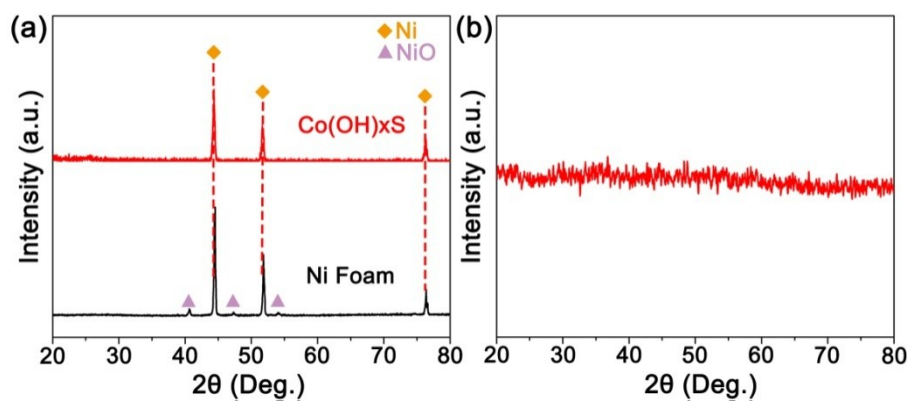

**Fig. S2** XRD patterns of  $\text{Co(OH)}_x\text{S}$  nanoflakes (a) on Ni foam and (b) as powder sample.

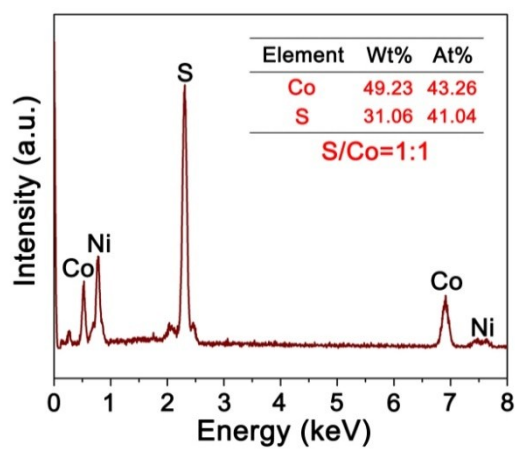

**Fig. S3** EDS spectrum of  $\text{Co(OH)}_x\text{S}$  nanoflakes.

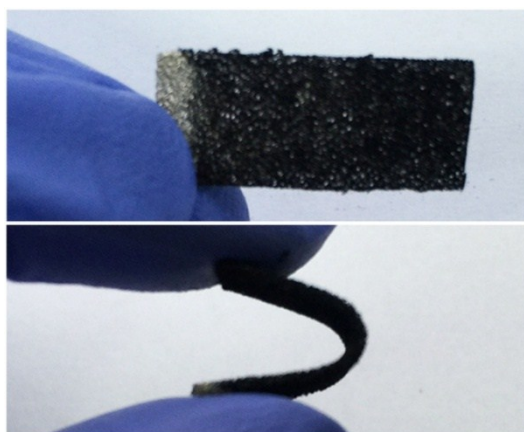

**Fig. S4** Digital photographs of  $\text{Co(OH)}_x\text{S}$  nanoflakes in flat and bending state.

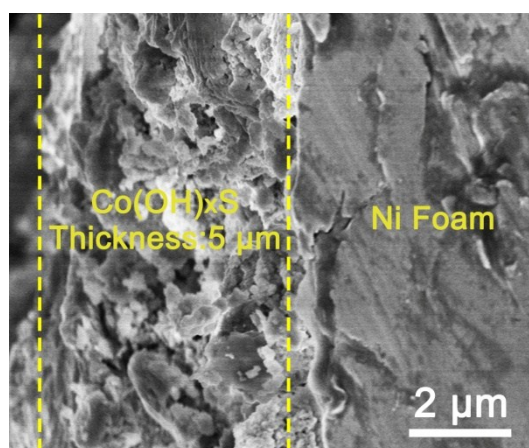

**Fig. S5** Sectional SEM image of  $\text{Co(OH)}_x\text{S}$  nanoflakes.

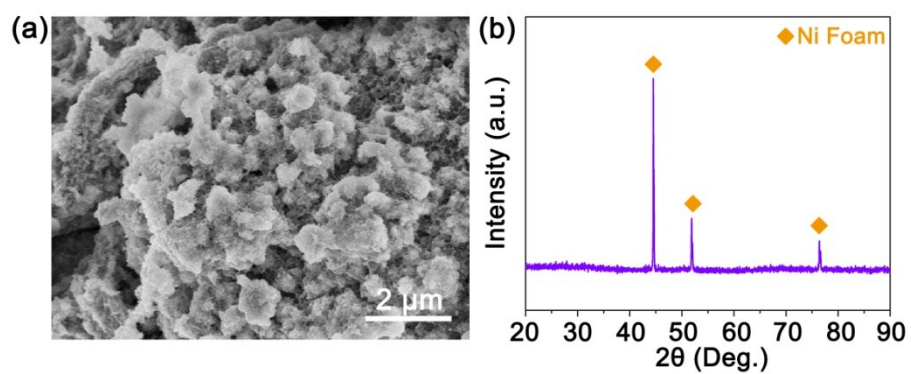

**Fig. S6** (a) SEM image and (b) XRD pattern of  $\text{Co(OH)}_x\text{S}$  nanoflakes aggregation.

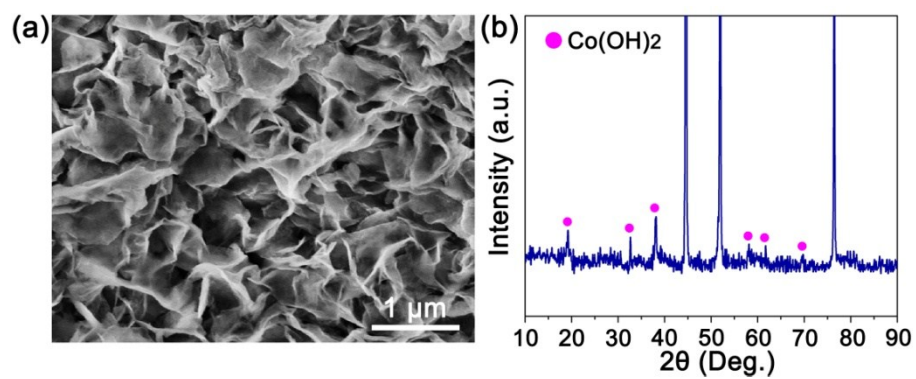

**Fig. S7** (a) SEM image and (b) XRD patterns of  $\text{Co(OH)}_x$  nanoflakes.

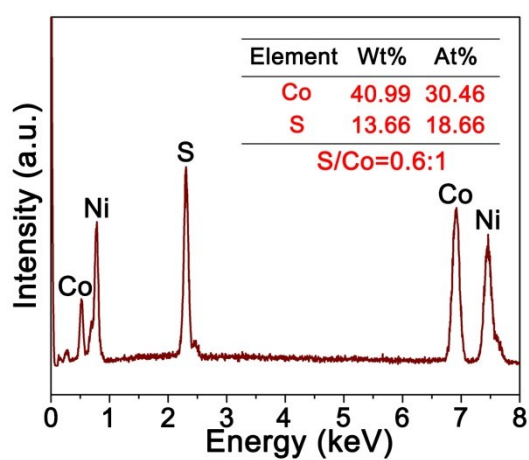

**Fig. S8** EDS spectrum of  $\text{Co(OH)}_x\text{S}_{0.6}$  nanoflakes.

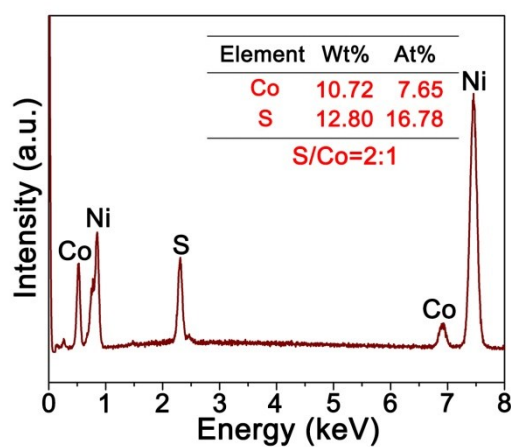

**Fig. S9** EDS spectrum of  $\text{Co(OH)}_x\text{S}_2$  nanoflakes.

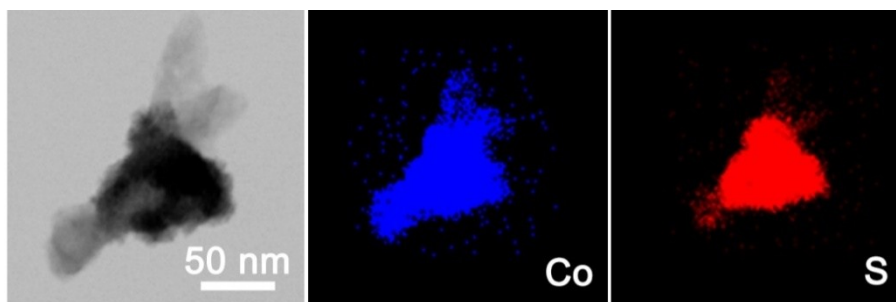

**Fig. S10** TEM-EDS mapping of a typical junction in  $\text{Co(OH)}_x\text{S}_2$  nanoflakes.

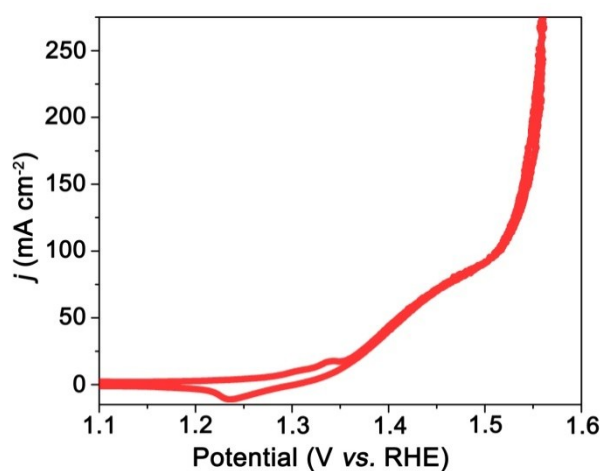

**Fig. S11** Cyclic voltammetric curve of  $\text{Co(OH)}_x\text{S}$  nanoflakes at scan rate of  $1 \text{ mV s}^{-1}$ .

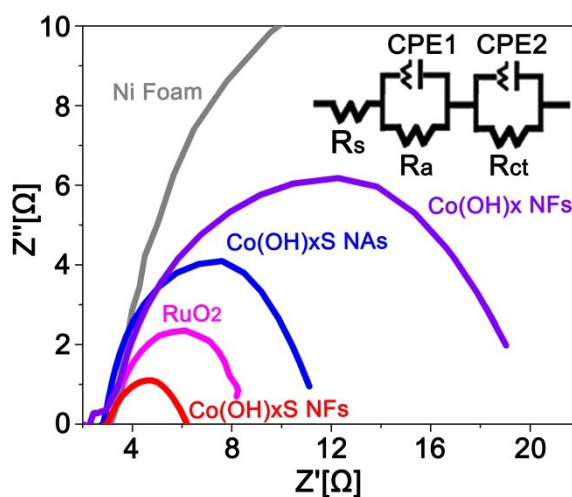

**Fig. S12** Nyquist plots of the  $\text{Co(OH)}_x\text{S}$  nanoflakes, the  $\text{Co(OH)}_x\text{S}$  nanoflakes aggregations, the  $\text{Co(OH)}_x$  nanoflakes and the commercial  $\text{RuO}_2$  (*inset* showing the equivalent circuit to fit the data).

The high-frequency response in Nyquist plots can be assigned to the solution resistance ( $R_s$ ), while the low-frequency response can be assigned to interfacial charge-transfer resistance ( $R_{ct}$ ) in OER process.

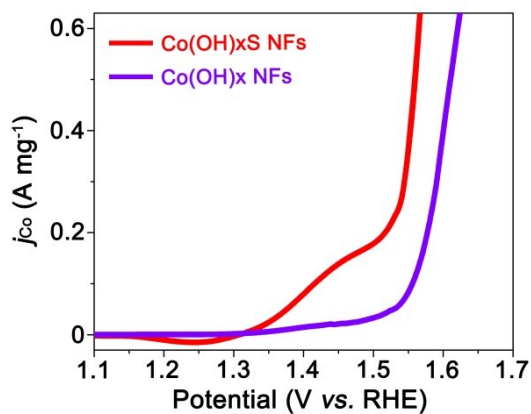

**Fig. S13** Mass activity curves of  $Co(OH)_xS$  and  $Co(OH)_x$  nanoflakes. The calculation is based on the mass loading of Co element.

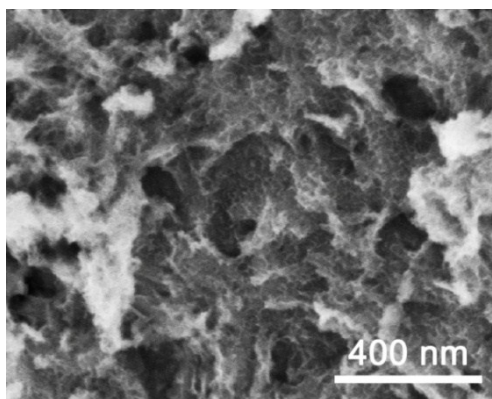

**Fig. S14** SEM image of  $Co(OH)_xS$  nanoflakes after CP evaluation.

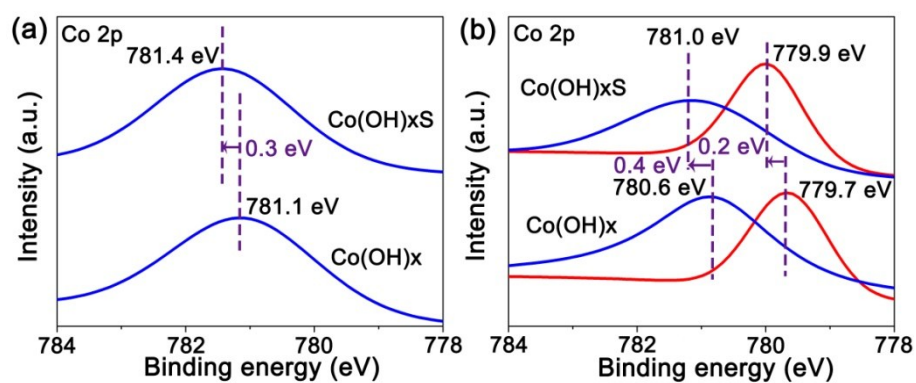

**Fig. S15** Co 2p spectra of Co(OH)<sub>x</sub>S and Co(OH)<sub>x</sub> nanoflakes (a) before and (b) after OER.

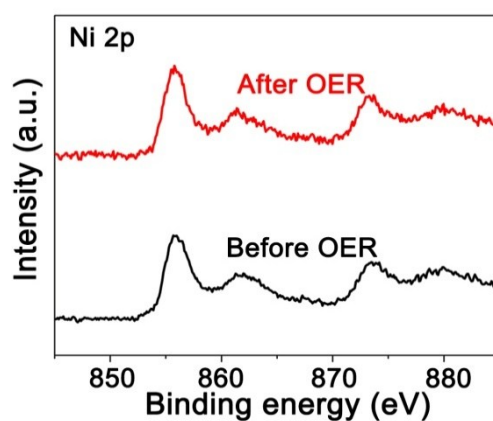

**Fig. S16** XPS spectra of Ni 2p region of Co(OH)<sub>x</sub>S nanoflakes before and after OER.

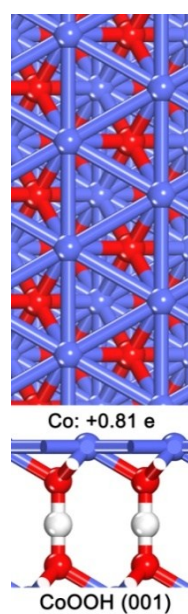

**Fig. S17** The optimized model structure of pristine CoOOH (001) facet.

### Part III: Supporting Table

**Table S1** Comparisons of OER performance of the reported state-of-the-art electrocatalysts.

| Electrocatalyst                                                                 | Mass loading<br>(mg cm <sup>-2</sup> ) | Measurement                | j<br>(mA cm <sup>-2</sup> ) | η<br>(mV)         | Tafel slope<br>(mV dec <sup>-1</sup> ) | Ref.         |
|---------------------------------------------------------------------------------|----------------------------------------|----------------------------|-----------------------------|-------------------|----------------------------------------|--------------|
| MoS <sub>2</sub> -Ni <sub>3</sub> S <sub>2</sub> nanorods                       | 13.00                                  | Ni foam<br>1.0 M KOH       | 100                         | 341               | 57                                     | 23           |
| Co(OH) <sub>2</sub> nanoparticle<br>encapsulating conductive<br>nanowires array | 7.50                                   | Cu foam<br>1.0 M KOH       | 100                         | 330               | 101                                    | 27           |
| Hierarchical Co(OH)F<br>superstructure                                          | /                                      | Glassy carbon<br>1.0 M KOH | 100                         | 390               | 53                                     | 28           |
| CoFe <sub>2</sub> O <sub>4</sub> /C porous hybrid<br>nanorod arrays             | 1.03                                   | Ni foam<br>1.0 M KOH       | 100                         | 285               | 45                                     | S14          |
| NiCo <sub>2</sub> S <sub>4</sub> nanowire arrays                                | /                                      | Ni foam<br>1.0 M KOH       | 100                         | 380               | 40                                     | S15          |
| Co-Mn carbonate<br>hydroxide nanosheets                                         | 5.60                                   | Ni foam<br>1.0 M KOH       | 100                         | 350               | /                                      | S16          |
| FeOOH/CeO <sub>2</sub> nanotubes                                                | 0.44                                   | Ni foam<br>1.0 M KOH       | 100                         | 320               | 92                                     | S17          |
| FeOOH/Co/FeOOH<br>nanotube arrays                                               | 0.50                                   | Ni foam<br>1.0 M NaOH      | 100                         | > 300             | 32                                     | S18          |
| NiFe alloyed<br>nanoparticles                                                   | 1.15                                   | Ni foam<br>1.0 M KOH       | 100                         | 290               | 30                                     | S19          |
| NiS microsphere film                                                            | 43.00                                  | Ni foam<br>1.0 M KOH       | 100                         | 350               | 89                                     | S20          |
| 3D porous Ni <sub>x</sub> P <sub>y</sub> /Ni                                    | 11.04                                  | Ni foam<br>1.0 M KOH       | 100                         | 320               | 73                                     | S21          |
| Ni <sub>3</sub> FeAl <sub>0.91</sub> -LDH                                       | 0.20                                   | Ni foam<br>1.0 M KOH       | 100                         | 350               | 50                                     | S22          |
| Benzoate intercalated<br>layered Co(OH) <sub>2</sub> nanoarray                  | 17.40                                  | Ni foam<br>1.0 M KOH       | 100                         | 311               | 73                                     | S23          |
| Amorphous Co(OH) <sub>x</sub> S<br>nanoflakes                                   | 1.00                                   | Ni foam<br>1.0 M KOH       | 100<br>200<br>1000          | 283<br>323<br>365 | 54                                     | This<br>work |

## References

- S1 G. Kresse, J. Furthmüller, *Phys. Rev. B* 1996, **54**, 11169.
- S2 G. Kresse, J. Hafner, *Phys. Rev. B* 1993, **47**, 558.
- S3 G. Kresse, J. Hafner, *Phys. Rev. B* 1994, **49**, 14251.
- S4 P. E. Blöchl, *Phys. Rev. B* 1994, **50**, 17953.
- S5 I. A. Vladimir, F. Aryasetiawan, A. I. Lichtenstein, *J. Phys.: Condens. Matter* 1997, **9**, 767.
- S6 V. I. Anisimov, J. Zaanen, O. K. Andersen, *Phys. Rev. B* 1991, **44**, 943.
- S7 O. L. Bacq, A. Pasturel, O. Bengone, *Phys. Rev. B* 2004, **69**, 245107.
- S8 M. Bajdich, M. García-Mota, A. Vojvodic, J. K. Nørskov, A. T. Bell, *J. Am. Chem. Soc.* 2013, **135**, 13521.
- S9 H. J. Monkhorst, J. D. Pack, *Phys. Rev. B* 1976, **13**, 5188.
- S10 M. Methfessel, A. T. Paxton, *Phys. Rev. B* 1989, **40**, 3616.
- S11 D. Sheppard, R. Terrell, G. Henkelman, *J. Chem. Phys.* 2008, **128**, 134106.
- S12 G. Henkelman, A. Arnaldsson, H. Jónsson, *Comput. Mater. Sci.* 2006, **36**, 354.
- S13 E. Sanville, S. D. Kenny, R. Smith, G. Henkelman, *J. Comput. Chem.* 2007, **28**, 899.
- S14 X. F. Lu, L. F. Gu, J. W. Wang, J. X. Wu, P. Q. Liao, G. R. Li, *Adv. Mater.* 2017, **29**, 1604437.
- S15 A. Sivanantham, P. Ganesan, S. Shanmugam, *Adv. Funct. Mater.* 2016, **26**, 4661.
- S16 T. Tang, W. J. Jiang, S. Niu, N. Liu, H. Luo, Y. Y. Chen, S. F. Jin, F. Gao, L. J. Wan, J. S. Hu, *J. Am. Chem. Soc.* 2017, **139**, 8320.
- S17 J. X. Feng, S. H. Ye, H. Xu, Y. X. Tong, G. R. Li, *Adv. Mater.* 2016, **28**, 4698.
- S18 J. X. Feng, H. Xu, Y. T. Dong, S. H. Ye, Y. X. Tong, G. R. Li, *Angew. Chem. Int. Ed.* 2016, **55**, 3694.
- S19 Y. Feng, H. Zhang, L. Fang, Y. Mu, Y. Wang, *ACS Catal.* 2016, **6**, 4477.

- S20 W. X. Zhu, X. Y. Yue, W. T. Zhang, S. X. Yu, Y. H. Zhang, J. Wang, J. L. Wang, *Chem. Commun.* 2016, **52**, 1486.
- S21 G. F. Chen, T. Y. Ma, Z. Q. Liu, N. Li, Y. Z. Su, K. Davey, S. Z. Qiao, *Adv. Funct. Mater.* 2016, **26**, 3314.
- S22 H. Liu, Y. Wang, X. Lu, Y. Hu, G. Zhu, R. Chen, L. Ma, H. Zhu, Z. Tie, J. Liu, Z. Jin, *Nano Energy* 2017, **35**, 350.
- S23 R. Ge, X. Ren, X. Ji, Z. Liu, G. Du, M. Asiri Abdullah, X. Sun, L. Chen, *Chemsuschem* 2017, **10**, 4004.
